# Supplementary material
Source: PubMed Central journal article supplement (PMC4254393)
Supplement: NIHMS602890-supplement-01.pdf [file NIHMS602890-supplement-01.pdf]

## Coordinated mRNA/microRNA Changes in Fibroblasts of Patients with Major Depression

### *Supplemental Information*

**Table S1. Subject information**

| Group | ID  | Age | Avg Age | Sex | Race | BMI  | Group | ID  | Age | Avg Age | Sex | Race | BMI  |
|-------|-----|-----|---------|-----|------|------|-------|-----|-----|---------|-----|------|------|
| CNTR1 | C1  | 34  | 37.5    | M   | AA   | 23.1 | MDD1  | D1  | 38  | 36.5    | M   | AA   | 31.6 |
|       | C2  | 38  |         | M   | W    | 20.5 |       | D2  | 33  |         | M   | W    | 41.9 |
|       | C3  | 48  |         | M   | W    | N/A  |       | D3  | 46  |         | M   | W    | 31   |
|       | C4  | 30  |         | M   | W    | N/A  |       | D4  | 29  |         | M   | W    | 19   |
| CNTR2 | C5  | 35  | 32.25   | F   | W    | 27.1 | MDD2  | D5  | 34  | 31      | F   | W    | N/A  |
|       | C6  | 40  |         | F   | W    | 21.2 |       | D6  | 37  |         | F   | W    | N/A  |
|       | C7  | 27  |         | F   | W    | 21.8 |       | D7  | 27  |         | F   | W    | 46.2 |
|       | C8  | 27  |         | F   | AA   | 34.7 |       | D8  | 26  |         | F   | AA   | 31.4 |
| CNTR3 | C9  | 51  | 49      | F   | AA   | 26   | MDD3  | D9  | 51  | 49.75   | F   | AA   | 28.9 |
|       | C10 | 49  |         | F   | W    | 26.2 |       | D10 | 52  |         | F   | W    | 24   |
|       | C11 | 52  |         | F   | W    | 26.3 |       | D11 | 53  |         | F   | W    | 28   |
|       | C12 | 44  |         | F   | W    | 25.1 |       | D12 | 43  |         | F   | W    | 50.7 |
| CNTR4 | C13 | 20  | 21.8    | F   | W    | 24   | MDD4  | D13 | 22  | 22.4    | F   | W    | 49.8 |
|       | C14 | 22  |         | F   | W    | 26.8 |       | D14 | 22  |         | F   | W    | 22.5 |
|       | C15 | 22  |         | F   | W    | 22   |       | D15 | 23  |         | F   | W    | 30.1 |
|       | C16 | 25  |         | F   | AA   | 30.5 |       | D16 | 23  |         | F   | AA   | 18.4 |

AA, African-American; Avg, average; BMI, body mass index; CNTR, controls; F, female; M, male; MDD, major depressive disorder; W, white.

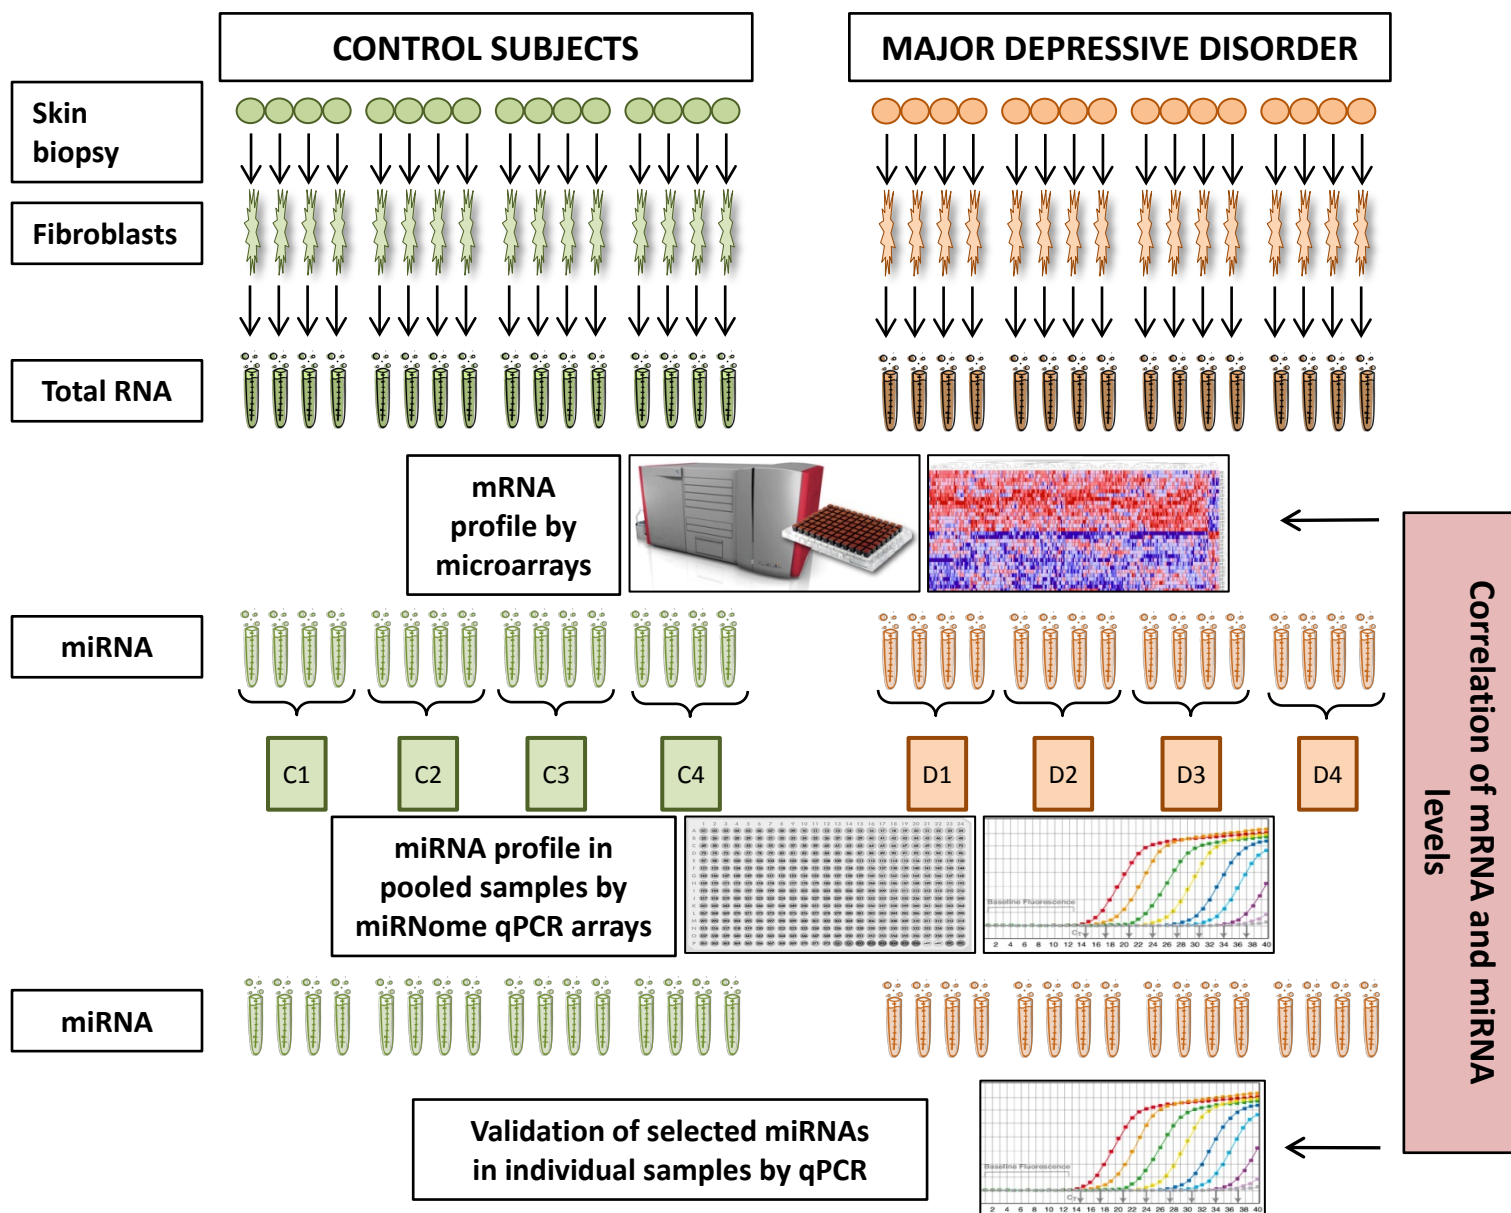

**Figure S1. Experimental design.** Skin biopsies were obtained using tissue punches from 16 major depressive disorder patients and 16 matched control subjects. Fibroblasts were propagated in tissue cultures with matching patient/control pairs cultured simultaneously under same conditions. This was followed by isolation on mRNA and miRNA. Individual mRNA expression profile was determined using GeneChip HT HG-U133+ PM Array Plate (Affymetrix Inc, Santa Clara, CA, USA). Initial miRNA profiling was performed using miRNome miRNA PCR Arrays (Qiagen, Valencia, CA, USA). The individual sample cDNAs were pooled in equal proportions into four groups based on gender and age (Table S1). The most robustly changed miRNAs were validated using quantitative polymerase chain reaction (qPCR) on individual samples. To better understand the relationship between the mRNA and miRNA changes, we correlated the two datasets based on the predicted miRNA targets.

**Table S2. mRNA expression changes between fibroblasts originating from major depressive disorder (MDD) patients and matched healthy controls (CNTR).** CNTR and MDD columns denote average log2 expression levels for the two diagnostic classes, ALR column represents magnitude of differential expression (positive values denote higher expression in MDD, negative values correspond to higher expression in controls). Paired *t*-test – pairwise comparison *p*-value; Group *t*-test – groupwise comparison *p*-value. Note that the downregulated genes in MDD fibroblasts greatly outnumber the upregulated ones.

| Probe Set ID    | Public ID | Gene Symbol  | Gene Name                                                                 | CNTR  | MDD   | ALR (MDD-CNTR) | Paired <i>t</i> -test | Group <i>t</i> -test |
|-----------------|-----------|--------------|---------------------------------------------------------------------------|-------|-------|----------------|-----------------------|----------------------|
| 208894_PM_at    | M60334    | HLA-DRA      | major histocompatibility complex, class II, DR alpha                      | 5.31  | 7.17  | 1.86           | 0.02893               | 0.04768              |
| 229479_PM_at    | AI739132  | ---          | ---                                                                       | 7.11  | 8.87  | 1.76           | 0.01735               | 0.01206              |
| 215193_PM_x_at  | AJ297586  | HLA-DRB      | major histocompatibility complex, class II, DR beta                       | 5.30  | 7.00  | 1.70           | 0.02389               | 0.04638              |
| 210982_PM_s_at  | M60333    | HLA-DRA      | major histocompatibility complex, class II, DR alpha                      | 5.74  | 7.40  | 1.66           | 0.02374               | 0.04891              |
| 209619_PM_at    | K01144    | CD74         | CD74 molecule, major histocompatibility complex, class II invariant chain | 5.88  | 7.39  | 1.51           | 0.02547               | 0.04955              |
| 215047_PM_at    | AL080170  | TRIM58       | tripartite motif-containing 58                                            | 4.64  | 5.99  | 1.34           | 0.01396               | 0.01728              |
| 204035_PM_at    | NM_003469 | SCG2         | secretogranin II                                                          | 6.80  | 8.07  | 1.27           | 0.00706               | 0.01554              |
| 201137_PM_s_at  | NM_002121 | HLA-DPB1     | major histocompatibility complex, class II, DP beta 1                     | 6.85  | 7.99  | 1.15           | 0.02463               | 0.03573              |
| 1558882_PM_at   | BI868572  | LOC401233    | cofactor required for Tat activation of HIV-1 transcription               | 5.60  | 6.56  | 0.96           | 0.00437               | 0.02345              |
| 229802_PM_at    | AA147884  | ---          | ---                                                                       | 10.46 | 11.28 | 0.81           | 0.03227               | 0.03040              |
| 1555963_PM_x_at | CA503291  | B3GNT7       | UDP-GlcNAc:betaGal beta-1,3-N-acetylglucosaminyltransferase 7             | 4.21  | 5.02  | 0.81           | 0.02155               | 0.02074              |
| 213831_PM_at    | X00452    | HLA-DQA1     | major histocompatibility complex, class II, DQ alpha 1                    | 4.03  | 4.83  | 0.80           | 0.03874               | 0.04060              |
| 1555962_PM_at   | CA503291  | B3GNT7       | UDP-GlcNAc:betaGal beta-1,3-N-acetylglucosaminyltransferase 7             | 4.25  | 5.04  | 0.79           | 0.01367               | 0.02526              |
| 215014_PM_at    | AL512727  | KCND3        | potassium voltage-gated channel, Shal-related subfamily, member 3         | 6.94  | 7.69  | 0.75           | 0.00954               | 0.00514              |
| 221854_PM_at    | AI378979  | PKP1         | plakophilin 1 (ectodermal dysplasia/skin fragility syndrome)              | 4.22  | 4.96  | 0.74           | 0.03414               | 0.04686              |
| 211836_PM_s_at  | U18800    | MOG          | myelin oligodendrocyte glycoprotein                                       | 4.03  | 4.73  | 0.70           | 0.00588               | 0.03425              |
| 207145_PM_at    | NM_005259 | MSTN         | myostatin                                                                 | 4.62  | 5.31  | 0.69           | 0.04953               | 0.03888              |
| 221558_PM_s_at  | AF288571  | LEF1         | lymphoid enhancer-binding factor 1                                        | 4.57  | 5.25  | 0.68           | 0.01958               | 0.03653              |
| 1569942_PM_at   | BC037802  | ---          | ---                                                                       | 4.11  | 4.77  | 0.66           | 0.01611               | 0.02984              |
| 233337_PM_s_at  | AF131749  | SEZ6L2       | seizure related 6 homolog (mouse)-like 2                                  | 6.18  | 6.83  | 0.65           | 0.01618               | 0.04045              |
| 201250_PM_s_at  | NM_006516 | SLC2A1       | solute carrier family 2 (facilitated glucose transporter), member 1       | 7.06  | 7.71  | 0.64           | 0.01076               | 0.02150              |
| 206560_PM_s_at  | NM_006533 | MIA          | melanoma inhibitory activity                                              | 4.88  | 5.51  | 0.63           | 0.00887               | 0.03750              |
| 1554133_PM_at   | BC041092  | RUFY2        | RUN and FYVE domain containing 2                                          | 5.33  | 5.95  | 0.62           | 0.02043               | 0.02962              |
| 1560031_PM_at   | R19413    | FRMD4A       | FERM domain containing 4A                                                 | 5.61  | 6.21  | 0.60           | 0.03118               | 0.03774              |
| 219497_PM_s_at  | NM_022893 | BCL11A       | B-cell CLL/lymphoma 11A (zinc finger protein)                             | 6.66  | 7.25  | 0.59           | 0.04756               | 0.02429              |
| 230574_PM_at    | AW139393  | LOC100130938 | hypothetical LOC100130938                                                 | 4.98  | 5.57  | 0.59           | 0.00697               | 0.00790              |
| 231361_PM_at    | AI912122  | NLGN1        | neuroigin 1                                                               | 7.28  | 6.70  | -0.59          | 0.03680               | 0.04543              |

| Probe Set ID    | Public ID | Gene Symbol | Gene Name                                                      | CNTR  | MDD  | ALR (MDD-CNTR) | Paired t-test | Group t-test |
|-----------------|-----------|-------------|----------------------------------------------------------------|-------|------|----------------|---------------|--------------|
| 204864_PM_s_at  | NM_002184 | IL6ST       | interleukin 6 signal transducer (gp130, oncostatin M receptor) | 8.18  | 7.59 | -0.59          | 0.00121       | 0.00032      |
| 211839_PM_s_at  | U22386    | CSF1        | colony stimulating factor 1 (macrophage)                       | 5.78  | 5.19 | -0.59          | 0.00756       | 0.00604      |
| 219247_PM_s_at  | NM_024630 | ZDHHC14     | zinc finger, DHHC-type containing 14                           | 6.79  | 6.20 | -0.59          | 0.00009       | 0.00116      |
| 213309_PM_at    | AL117515  | PLCL2       | phospholipase C-like 2                                         | 6.93  | 6.34 | -0.59          | 0.02215       | 0.01868      |
| 212992_PM_at    | AI935123  | AHNAK2      | AHNAK nucleoprotein 2                                          | 10.27 | 9.68 | -0.60          | 0.01680       | 0.03502      |
| 211572_PM_s_at  | AF092511  | SLC23A2     | solute carrier family 23 (nucleobase transporters), member 2   | 6.41  | 5.80 | -0.60          | 0.00002       | 0.00001      |
| 212240_PM_s_at  | AI679268  | PIK3R1      | phosphoinositide-3-kinase, regulatory subunit 1 (alpha)        | 9.38  | 8.78 | -0.60          | 0.01641       | 0.00986      |
| 220945_PM_x_at  | NM_018050 | MANSC1      | MANSC domain containing 1                                      | 6.50  | 5.90 | -0.60          | 0.02106       | 0.02263      |
| 239002_PM_at    | AA748494  | ASPM        | asp (abnormal spindle) homolog, microcephaly associated        | 6.01  | 5.40 | -0.60          | 0.01244       | 0.00882      |
| 1560020_PM_at   | BC043583  | DNAJC13     | DnaJ (Hsp40) homolog, subfamily C, member 13                   | 7.09  | 6.48 | -0.61          | 0.00051       | 0.00006      |
| 236557_PM_at    | AW085625  | ZBTB38      | zinc finger and BTB domain containing 38                       | 7.78  | 7.17 | -0.61          | 0.00011       | 0.00001      |
| 214537_PM_at    | NM_005320 | HIST1H1D    | histone cluster 1, H1d                                         | 5.73  | 5.12 | -0.61          | 0.00393       | 0.00330      |
| 215324_PM_at    | AA343027  | SEMA3D      | semaphorin 3D                                                  | 5.77  | 5.16 | -0.61          | 0.02033       | 0.01689      |
| 216493_PM_s_at  | AL023775  | IGF2BP3     | insulin-like growth factor 2 mRNA binding protein 3            | 6.09  | 5.48 | -0.61          | 0.03735       | 0.01742      |
| 220580_PM_at    | NM_025044 | BICC1       | bicaudal C homolog 1 (Drosophila)                              | 6.83  | 6.22 | -0.61          | 0.00263       | 0.00790      |
| 205543_PM_at    | NM_014278 | HSPA4L      | heat shock 70kDa protein 4-like                                | 6.52  | 5.91 | -0.61          | 0.00142       | 0.01122      |
| 203619_PM_s_at  | NM_012306 | FAIM2       | Fas apoptotic inhibitory molecule 2                            | 5.58  | 4.97 | -0.62          | 0.04341       | 0.04587      |
| 216218_PM_s_at  | AK023546  | PLCL2       | phospholipase C-like 2                                         | 5.81  | 5.19 | -0.62          | 0.00770       | 0.00090      |
| 241495_PM_at    | AI675298  | CCNL1       | cyclin L1                                                      | 6.08  | 5.45 | -0.62          | 0.02390       | 0.01103      |
| 242665_PM_at    | AL042120  | FMNL2       | formin-like 2                                                  | 6.21  | 5.58 | -0.62          | 0.00541       | 0.00058      |
| 229244_PM_at    | AI400057  | LSAMP       | limbic system-associated membrane protein                      | 5.97  | 5.34 | -0.63          | 0.01310       | 0.01848      |
| 202434_PM_s_at  | N21019    | CYP1B1      | cytochrome P450, family 1, subfamily B, polypeptide 1          | 9.77  | 9.14 | -0.63          | 0.03448       | 0.01964      |
| 227463_PM_at    | AW057540  | ACE         | angiotensin I converting enzyme (peptidyl-dipeptidase A) 1     | 5.66  | 5.03 | -0.63          | 0.01802       | 0.04951      |
| 219779_PM_at    | NM_024721 | ZFHX4       | zinc finger homeobox 4                                         | 8.39  | 7.76 | -0.63          | 0.04016       | 0.02516      |
| 235201_PM_at    | AW167727  | FOXP2       | forkhead box P2                                                | 8.02  | 7.39 | -0.64          | 0.04573       | 0.04479      |
| 242458_PM_at    | AA721230  | RALGPS2     | Ral GEF with PH domain and SH3 binding motif 2                 | 6.92  | 6.28 | -0.64          | 0.00774       | 0.00541      |
| 232940_PM_s_at  | AK025911  | MLL3        | myeloid/lymphoid or mixed-lineage leukemia 3                   | 7.22  | 6.58 | -0.64          | 0.00082       | 0.00015      |
| 210990_PM_s_at  | U77706    | LAMA4       | laminin, alpha 4                                               | 10.44 | 9.80 | -0.64          | 0.00040       | 0.00051      |
| 220154_PM_at    | NM_020388 | DST         | dystonin                                                       | 6.21  | 5.57 | -0.64          | 0.00117       | 0.00010      |
| 1555131_PM_a_at | BC026102  | PER3        | period homolog 3 (Drosophila)                                  | 5.57  | 4.93 | -0.64          | 0.00102       | 0.00049      |
| 213844_PM_at    | NM_019102 | HOXA5       | homeobox A5                                                    | 6.19  | 5.55 | -0.64          | 0.02158       | 0.01117      |
| 207419_PM_s_at  | NM_002872 | RAC2        | ras-related C3 botulinum toxin substrate 2                     | 6.44  | 5.79 | -0.65          | 0.02733       | 0.02948      |
| 1556329_PM_a_at | BC042378  | ---         | ---                                                            | 4.49  | 3.85 | -0.65          | 0.04453       | 0.02951      |
| 207099_PM_s_at  | NM_000390 | CHM         | choroideremia (Rab escort protein 1)                           | 7.35  | 6.71 | -0.65          | 0.00014       | 0.00000      |
| 232238_PM_at    | AK001380  | ASPM        | asp (abnormal spindle) homolog, microcephaly associated        | 6.63  | 5.98 | -0.65          | 0.00474       | 0.00401      |

| Probe Set ID    | Public ID | Gene Symbol | Gene Name                                                                | CNTR  | MDD  | ALR (MDD-CNTR) | Paired t-test | Group t-test |
|-----------------|-----------|-------------|--------------------------------------------------------------------------|-------|------|----------------|---------------|--------------|
| 215303_PM_at    | BE046461  | DCLK1       | doublecortin-like kinase 1                                               | 5.11  | 4.46 | -0.65          | 0.01074       | 0.03212      |
| 1563947_PM_a_at | AK097177  | ERC1        | ELKS/RAB6-interacting/CAST family member 1                               | 6.89  | 6.24 | -0.65          | 0.00000       | 0.00013      |
| 216361_PM_s_at  | AJ251844  | MYST3       | MYST histone acetyltransferase (monocytic leukemia) 3                    | 5.37  | 4.72 | -0.65          | 0.00007       | 0.00001      |
| 220266_PM_s_at  | NM_004235 | KLF4        | Kruppel-like factor 4 (gut)                                              | 8.40  | 7.74 | -0.65          | 0.01748       | 0.00618      |
| 1555675_PM_at   | AF303179  | BLID        | BH3-like motif containing, cell death inducer                            | 6.01  | 5.35 | -0.66          | 0.00665       | 0.00840      |
| 205197_PM_s_at  | BE567813  | ATP7A       | ATPase, Cu <sup>++</sup> transporting, alpha polypeptide                 | 7.01  | 6.35 | -0.66          | 0.00119       | 0.00159      |
| 223842_PM_s_at  | AB007830  | SCARA3      | scavenger receptor class A, member 3                                     | 7.49  | 6.83 | -0.66          | 0.01892       | 0.03511      |
| 242019_PM_at    | BG257755  | LASS6       | LAG1 homolog, ceramide synthase 6                                        | 5.47  | 4.80 | -0.66          | 0.00009       | 0.00010      |
| 223551_PM_at    | AF225513  | PKIB        | protein kinase (cAMP-dependent, catalytic) inhibitor beta                | 4.51  | 3.84 | -0.66          | 0.02345       | 0.03252      |
| 215992_PM_s_at  | AL117397  | RAPGEF2     | Rap guanine nucleotide exchange factor (GEF) 2                           | 6.48  | 5.81 | -0.67          | 0.00009       | 0.00001      |
| 242349_PM_at    | AW275658  | HECTD1      | HECT domain containing 1                                                 | 7.77  | 7.11 | -0.67          | 0.00000       | 0.00000      |
| 1568598_PM_at   | BF434771  | KAZALD1     | Kazal-type serine peptidase inhibitor domain 1                           | 6.29  | 5.62 | -0.67          | 0.02721       | 0.01036      |
| 231382_PM_at    | AI798863  | FGF18       | fibroblast growth factor 18                                              | 5.40  | 4.73 | -0.67          | 0.04928       | 0.03708      |
| 224909_PM_s_at  | BF308645  | PREX1       | phosphatidylinositol-3,4,5-trisphosphate-dependent Rac exchange factor 1 | 5.51  | 4.84 | -0.68          | 0.00030       | 0.00016      |
| 1553191_PM_at   | NM_020388 | DST         | dystonin                                                                 | 8.06  | 7.38 | -0.68          | 0.00211       | 0.00037      |
| 205290_PM_s_at  | NM_001200 | BMP2        | bone morphogenetic protein 2                                             | 5.25  | 4.57 | -0.68          | 0.00271       | 0.00959      |
| 212650_PM_at    | BF116032  | EHBP1       | EH domain binding protein 1                                              | 10.65 | 9.97 | -0.69          | 0.00004       | 0.00004      |
| 204322_PM_at    | BF002254  | GOLIM4      | golgi integral membrane protein 4                                        | 6.91  | 6.21 | -0.70          | 0.00001       | 0.00006      |
| 230285_PM_at    | BF447829  | SVIP        | small VCP/p97-interacting protein                                        | 5.19  | 4.49 | -0.70          | 0.00232       | 0.00231      |
| 243844_PM_at    | AI816790  | ---         | ---                                                                      | 5.51  | 4.81 | -0.70          | 0.02986       | 0.03983      |
| 203788_PM_s_at  | AI962897  | SEMA3C      | semaphorin 3C                                                            | 9.95  | 9.24 | -0.70          | 0.03050       | 0.01035      |
| 232166_PM_at    | AL045516  | KIAA1377    | KIAA1377                                                                 | 7.23  | 6.52 | -0.71          | 0.00042       | 0.00105      |
| 1554310_PM_a_at | BC030578  | EIF4G3      | eukaryotic translation initiation factor 4 gamma, 3                      | 7.41  | 6.70 | -0.71          | 0.00000       | 0.00000      |
| 206638_PM_at    | NM_000867 | HTR2B       | 5-hydroxytryptamine (serotonin) receptor 2B                              | 4.52  | 3.80 | -0.72          | 0.03023       | 0.02146      |
| 217504_PM_at    | AA099357  | ABCA6       | ATP-binding cassette, sub-family A (ABC1), member 6                      | 7.31  | 6.59 | -0.72          | 0.01175       | 0.03929      |
| 235281_PM_x_at  | AA523289  | AHNAK       | AHNAK nucleoprotein                                                      | 7.79  | 7.07 | -0.73          | 0.00000       | 0.00000      |
| 241955_PM_at    | BE243270  | HECTD1      | HECT domain containing 1                                                 | 8.87  | 8.15 | -0.73          | 0.00000       | 0.00001      |
| 217053_PM_x_at  | X87175    | ETV1        | ets variant 1                                                            | 5.80  | 5.07 | -0.73          | 0.03184       | 0.00638      |
| 215561_PM_s_at  | AK026803  | IL1R1       | interleukin 1 receptor, type I                                           | 7.34  | 6.61 | -0.73          | 0.00837       | 0.01801      |
| 207992_PM_s_at  | NM_000480 | AMPD3       | adenosine monophosphate deaminase 3                                      | 7.97  | 7.23 | -0.73          | 0.01784       | 0.01575      |
| 238356_PM_at    | AW968823  | DOCK11      | dedicator of cytokinesis 11                                              | 6.90  | 6.17 | -0.73          | 0.00793       | 0.00332      |
| 235996_PM_at    | BF979984  | RASSF8      | Ras association (RalGDS/AF-6) domain family (N-terminal) member 8        | 7.43  | 6.70 | -0.73          | 0.00147       | 0.00054      |
| 213033_PM_s_at  | AI186739  | NFIB        | nuclear factor I/B                                                       | 7.26  | 6.52 | -0.74          | 0.03147       | 0.02905      |
| 210461_PM_s_at  | BC002448  | ABLIM1      | actin binding LIM protein 1                                              | 5.96  | 5.21 | -0.75          | 0.00285       | 0.00265      |
| 236207_PM_at    | BE083088  | SSFA2       | sperm specific antigen 2                                                 | 6.32  | 5.57 | -0.75          | 0.00002       | 0.00000      |

| Probe Set ID    | Public ID | Gene Symbol | Gene Name                                                                                                       | CNTR | MDD  | ALR (MDD-CNTR) | Paired t-test | Group t-test |
|-----------------|-----------|-------------|-----------------------------------------------------------------------------------------------------------------|------|------|----------------|---------------|--------------|
| 238332_PM_at    | AI307802  | ANKRD29     | ankyrin repeat domain 29                                                                                        | 7.37 | 6.61 | -0.76          | 0.00697       | 0.00792      |
| 1555097_PM_a_at | BC035694  | PTGFR       | prostaglandin F receptor (FP)<br>carnitine palmitoyltransferase 1A<br>(liver)                                   | 9.00 | 8.24 | -0.76          | 0.02465       | 0.04005      |
| 203634_PM_s_at  | NM_001876 | CPT1A       | Cas-Br-M (murine) ecotropic retroviral<br>transforming sequence                                                 | 5.90 | 5.14 | -0.76          | 0.00000       | 0.00000      |
| 229010_PM_at    | AI807026  | CBL         | paired box 3                                                                                                    | 7.67 | 6.91 | -0.76          | 0.00002       | 0.00009      |
| 231666_PM_at    | AA194168  | PAX3        | DNA-damage-inducible transcript 4-<br>like                                                                      | 6.82 | 6.06 | -0.76          | 0.04452       | 0.02876      |
| 228057_PM_at    | AA528140  | DDIT4L      | poly(A) binding protein, cytoplasmic<br>4-like                                                                  | 6.20 | 5.44 | -0.76          | 0.00680       | 0.01095      |
| 238865_PM_at    | AI822134  | PABPC4L     | sushi, von Willebrand factor type A,<br>EGF and pentraxin domain containing<br>1                                | 6.06 | 5.30 | -0.76          | 0.03726       | 0.02234      |
| 224543_PM_at    | AF308289  | SVEP1       | prostaglandin F2 receptor negative<br>regulator                                                                 | 7.39 | 6.62 | -0.77          | 0.02379       | 0.03056      |
| 224950_PM_at    | BF476250  | PTGFRN      | chromosome 13 open reading frame<br>31                                                                          | 8.10 | 7.33 | -0.77          | 0.00887       | 0.03698      |
| 1553141_PM_at   | BC035749  | C13orf31    | X-prolyl aminopeptidase<br>(aminopeptidase P) 3, putative                                                       | 7.53 | 6.76 | -0.77          | 0.03820       | 0.02437      |
| 227910_PM_at    | AI635379  | XPNPEP3     | folliculin interacting protein 1                                                                                | 6.75 | 5.97 | -0.77          | 0.00924       | 0.02987      |
| 223997_PM_at    | BC001956  | FNIP1       | sushi, von Willebrand factor type A,<br>EGF and pentraxin domain containing<br>1                                | 6.47 | 5.69 | -0.78          | 0.00001       | 0.00003      |
| 219552_PM_at    | NM_024500 | SVEP1       | Ly6/neurotoxin 1<br>ectonucleotide<br>pyrophosphatase/phosphodiesterase<br>4 (putative function)                | 7.86 | 7.08 | -0.78          | 0.01237       | 0.02400      |
| 226305_PM_at    | AV696976  | LYNX1       | occludin                                                                                                        | 7.12 | 6.34 | -0.78          | 0.02177       | 0.03345      |
| 204160_PM_s_at  | AW194947  | ENPP4       | HECT domain containing 1<br>family with sequence similarity 171,<br>member B                                    | 7.39 | 6.60 | -0.78          | 0.00893       | 0.02243      |
| 227492_PM_at    | AI829721  | OCN         | sushi, nidogen and EGF-like domains<br>1                                                                        | 6.10 | 5.30 | -0.79          | 0.04518       | 0.03142      |
| 241683_PM_at    | AW207734  | HECTD1      | zinc finger, CCHC domain containing<br>2                                                                        | 6.19 | 5.39 | -0.80          | 0.00000       | 0.00000      |
| 242762_PM_s_at  | AA372349  | FAM171B     | KIAA1324-like                                                                                                   | 6.24 | 5.44 | -0.80          | 0.00028       | 0.00018      |
| 213488_PM_at    | N73970    | SNED1       | phosphodiesterase 1A, calmodulin-<br>dependent                                                                  | 8.90 | 8.10 | -0.80          | 0.01682       | 0.02093      |
| 222816_PM_s_at  | BE676543  | ZCCHC2      | KIAA1324-like                                                                                                   | 6.94 | 6.13 | -0.81          | 0.00769       | 0.00401      |
| 235301_PM_at    | AI797353  | KIAA1324L   | endoplasmic reticulum<br>aminopeptidase 1                                                                       | 8.08 | 7.26 | -0.81          | 0.04383       | 0.04483      |
| 231213_PM_at    | AU146305  | PDE1A       | mannan-binding lectin serine<br>peptidase 1                                                                     | 7.33 | 6.51 | -0.82          | 0.02203       | 0.02105      |
| 244317_PM_at    | BF035563  | KIAA1324L   | tumor necrosis factor receptor<br>superfamily, member 19                                                        | 6.16 | 5.34 | -0.82          | 0.01352       | 0.02543      |
| 214012_PM_at    | BE551138  | ERAP1       | insulin-like growth factor 2 mRNA<br>binding protein 3                                                          | 7.07 | 6.23 | -0.84          | 0.01552       | 0.01738      |
| 213749_PM_at    | AV686235  | MASP1       | ---                                                                                                             | 6.54 | 5.70 | -0.84          | 0.04530       | 0.01480      |
| 223827_PM_at    | AF246998  | TNFRSF19    | ---                                                                                                             | 7.61 | 6.77 | -0.85          | 0.03655       | 0.02416      |
| 203819_PM_s_at  | AU160004  | IGF2BP3     | Ras association (RalGDS/AF-6)<br>domain family (N-terminal) member 8<br>chromosome 10 open reading frame<br>116 | 6.69 | 5.84 | -0.85          | 0.01266       | 0.00622      |
| 240815_PM_at    | R62588    | ---         | ---                                                                                                             | 7.58 | 6.72 | -0.85          | 0.00008       | 0.00001      |
| 207754_PM_at    | NM_007211 | RASSF8      | prostaglandin E synthase                                                                                        | 9.01 | 8.15 | -0.86          | 0.01469       | 0.04169      |
| 203571_PM_s_at  | NM_006829 | C10orf116   | prostaglandin E synthase                                                                                        | 7.85 | 6.99 | -0.86          | 0.03371       | 0.00913      |
| 207388_PM_s_at  | NM_004878 | PTGES       | early B-cell factor 3                                                                                           | 6.81 | 5.93 | -0.88          | 0.00248       | 0.00701      |
| 227243_PM_s_at  | AL354950  | EBF3        |                                                                                                                 |      |      |                |               |              |

| Probe Set ID    | Public ID | Gene Symbol      | Gene Name                                                    | CNTR | MDD  | ALR (MDD-CNTR) | Paired t-test | Group t-test |
|-----------------|-----------|------------------|--------------------------------------------------------------|------|------|----------------|---------------|--------------|
| 205352_PM_at    | NM_005025 | SERPINI1         | serpin peptidase inhibitor, clade I (neuroserpin), member 1  | 6.37 | 5.48 | -0.89          | 0.00626       | 0.01004      |
| 215451_PM_s_at  | BF575588  | AFF1             | AF4/FMR2 family, member 1                                    | 6.86 | 5.95 | -0.91          | 0.00000       | 0.00000      |
| 213032_PM_at    | AI186739  | NFIB             | nuclear factor I/B                                           | 8.36 | 7.43 | -0.93          | 0.04215       | 0.03556      |
| 217767_PM_at    | NM_000064 | C3               | complement component 3                                       | 8.05 | 7.10 | -0.95          | 0.00357       | 0.01306      |
| 201641_PM_at    | NM_004335 | BST2             | bone marrow stromal cell antigen 2                           | 5.22 | 4.26 | -0.96          | 0.02141       | 0.00839      |
| 235743_PM_at    | AA808178  | ---              | ---                                                          | 7.61 | 6.64 | -0.97          | 0.00972       | 0.01408      |
| 212865_PM_s_at  | BF449063  | COL14A1          | collagen, type XIV, alpha 1                                  | 7.88 | 6.91 | -0.97          | 0.02833       | 0.03163      |
| 206765_PM_at    | AF153820  | KCNJ2            | potassium inwardly-rectifying channel, subfamily J, member 2 | 6.70 | 5.72 | -0.98          | 0.02105       | 0.03535      |
| 233547_PM_x_at  | N53248    | PDE1A            | phosphodiesterase 1A, calmodulin-dependent                   | 6.66 | 5.67 | -0.98          | 0.01056       | 0.03217      |
| 205830_PM_at    | NM_004362 | CLGN             | calmegin                                                     | 5.70 | 4.71 | -0.99          | 0.01615       | 0.01278      |
| 224090_PM_s_at  | AB040434  | TNFRSF19         | tumor necrosis factor receptor superfamily, member 19        | 6.69 | 5.69 | -1.00          | 0.02977       | 0.00854      |
| 206108_PM_s_at  | NM_006275 | SFRS6            | splicing factor, arginine/serine-rich 6                      | 9.23 | 8.22 | -1.00          | 0.02418       | 0.03451      |
| 235182_PM_at    | AI816793  | ISM1             | isthmin 1 homolog (zebrafish)                                | 5.54 | 4.53 | -1.00          | 0.00852       | 0.01052      |
| 208719_PM_s_at  | U59321    | DDX17            | DEAD (Asp-Glu-Ala-Asp) box polypeptide 17                    | 9.03 | 8.02 | -1.01          | 0.01500       | 0.01539      |
| 208151_PM_x_at  | NM_030881 | DDX17            | DEAD (Asp-Glu-Ala-Asp) box polypeptide 17                    | 9.38 | 8.37 | -1.01          | 0.01152       | 0.01259      |
| 205399_PM_at    | NM_004734 | DCLK1            | doublecortin-like kinase 1                                   | 7.70 | 6.67 | -1.03          | 0.03105       | 0.02870      |
| 218730_PM_s_at  | NM_014057 | OGN              | osteoglycin                                                  | 5.44 | 4.35 | -1.09          | 0.03972       | 0.01478      |
| 206172_PM_at    | NM_000640 | IL13RA2          | interleukin 13 receptor, alpha 2                             | 7.16 | 6.02 | -1.14          | 0.03670       | 0.03408      |
| 206176_PM_at    | NM_001718 | BMP6             | bone morphogenetic protein 6                                 | 7.10 | 5.97 | -1.14          | 0.03339       | 0.01775      |
| 1558378_PM_a_at | BC004283  | AHNAK2           | AHNAK nucleoprotein 2                                        | 9.61 | 8.47 | -1.15          | 0.00009       | 0.00009      |
| 208396_PM_s_at  | NM_005019 | PDE1A            | phosphodiesterase 1A, calmodulin-dependent                   | 7.81 | 6.66 | -1.16          | 0.01221       | 0.02972      |
| 222722_PM_at    | AV700059  | OGN              | osteoglycin                                                  | 6.17 | 5.00 | -1.17          | 0.03798       | 0.02058      |
| 210367_PM_s_at  | AF010316  | PTGES            | prostaglandin E synthase                                     | 9.10 | 7.93 | -1.17          | 0.03073       | 0.00715      |
| 213816_PM_s_at  | AA005141  | MET              | met proto-oncogene (hepatocyte growth factor receptor)       | 7.68 | 6.48 | -1.21          | 0.00474       | 0.00128      |
| 208609_PM_s_at  | NM_019105 | TNXB             | tenascin XB                                                  | 7.67 | 6.38 | -1.30          | 0.04043       | 0.02516      |
| 216333_PM_x_at  | M25813    | TNXB             | tenascin XB                                                  | 8.50 | 7.19 | -1.30          | 0.04545       | 0.02515      |
| 1558680_PM_s_at | BQ894022  | PDE1A            | phosphodiesterase 1A, calmodulin-dependent                   | 8.07 | 6.76 | -1.31          | 0.00904       | 0.02333      |
| 203407_PM_at    | NM_002705 | PPL              | periplakin                                                   | 8.59 | 7.25 | -1.34          | 0.00556       | 0.02714      |
| 227242_PM_s_at  | BF592034  | EBF3             | early B-cell factor 3                                        | 6.91 | 5.57 | -1.34          | 0.00506       | 0.00510      |
| 206093_PM_x_at  | NM_007116 | TNXA ///<br>TNXB | tenascin XA pseudogene /// tenascin XB                       | 8.29 | 6.85 | -1.44          | 0.02777       | 0.01369      |
| 213451_PM_x_at  | BE044614  | TNXA ///<br>TNXB | tenascin XA pseudogene /// tenascin XB                       | 8.74 | 7.29 | -1.46          | 0.03398       | 0.01774      |
| 203815_PM_at    | NM_000853 | GSTT1            | glutathione S-transferase theta 1                            | 8.48 | 6.96 | -1.51          | 0.01804       | 0.01345      |
| 228635_PM_at    | AI640307  | PCDH10           | protocadherin 10                                             | 5.86 | 4.13 | -1.73          | 0.00154       | 0.00057      |

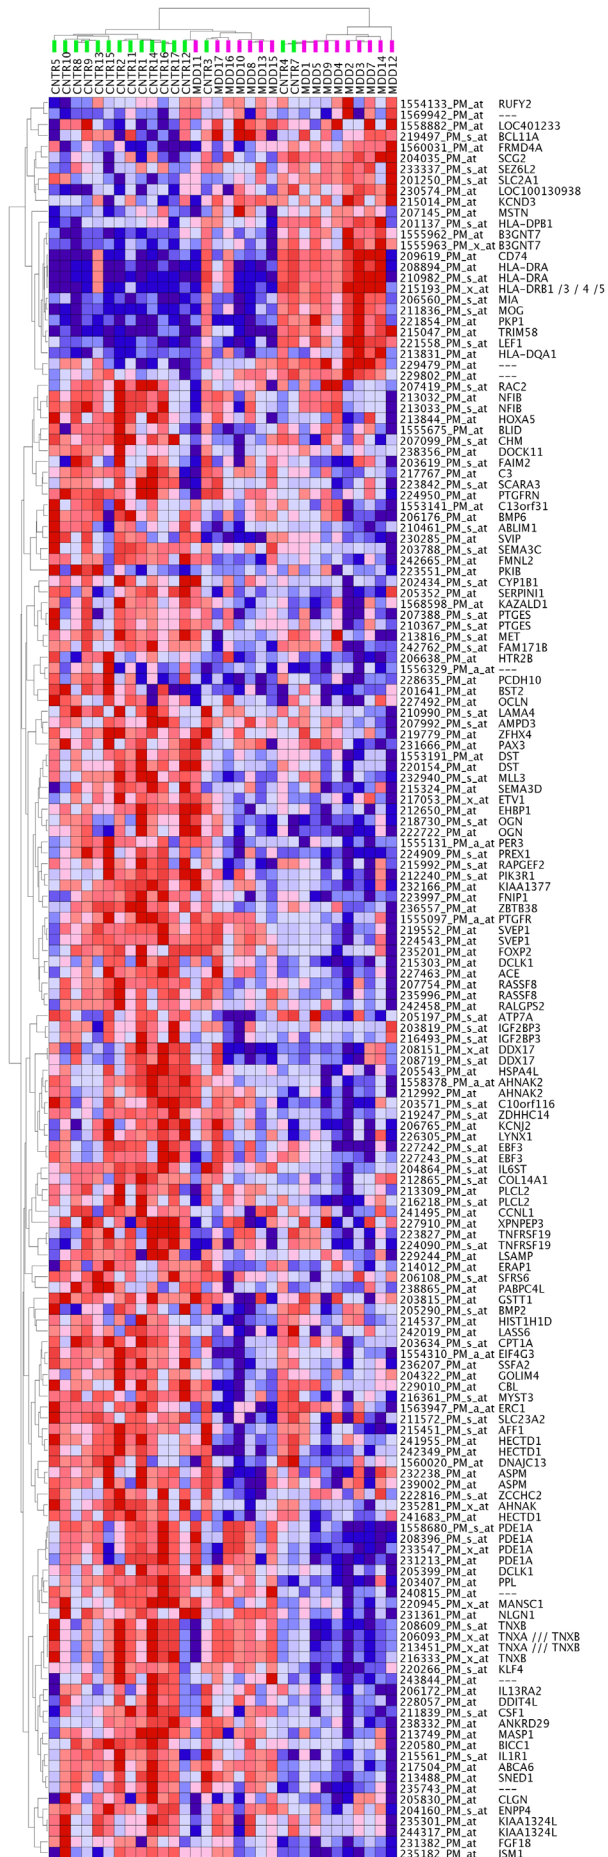

**Figure S2. mRNA expression profile differences between fibroblasts from major depressive disorder (MDD) and control (CNTR) subjects.** Two-way unsupervised hierarchical clustering was performed on the Log 2 expression levels of 162 differentially expressed mRNAs. Samples were clustered vertically, mRNAs were clustered horizontally. Each colored square represents a normalized gene expression level, color coded for increase (red) or decrease (blue) from the mean. Color intensity is proportional to magnitude of change. Alpha-numerical entries to the right of the column denote microarray probe sets and gene symbols. The clustering resulted in a separation of the majority of samples that was related to the diagnostic condition (vertical dendrogram: green - CNTR samples, purple - MDD samples). For more detail, see Table S2.



**Figure S3. Microarray data validation by quantitative polymerase chain reaction (qPCR).** qPCR analyses were used to independently test the expression level of 14 mRNAs. The Ct values for each of them was normalized to the GAPDH Ct value and the difference between controls (CNTR) and major depressive disorder (MDD) patients was measured by  $\Delta\Delta Ct$  ( $\Delta\Delta Ct = \Delta Ct_{CNTR} - \Delta Ct_{MDD}$ ). Microarray expression differences measured by average logarithmic ratio (ALR) (y-axis) were correlated to the qPCR differences measured by  $\Delta\Delta Ct$  (x-axis).

| Gene symbol | qPCR $\Delta\Delta Ct$ | qPCR pVal | MA ALR | MA pVal |
|-------------|------------------------|-----------|--------|---------|
| CD74        | 2.29                   | 0.012     | 1.51   | 0.049   |
| HLA-DRA     | 1.61                   | 0.017     | 1.86   | 0.048   |
| HLA-DQB1    | 1.31                   | 0.018     | 0.76   | 0.043   |
| IL11        | 1.13                   | 0.017     | 0.83   | 0.019   |
| DPA1        | 1.08                   | 0.011     | 0.96   | 0.037   |
| S100B       | 1.05                   | 0.031     | 1.14   | 0.037   |
| BEGF        | 1.00                   | 0.010     | 0.83   | 0.031   |
| HLA-DPB1    | 0.43                   | 0.156     | 1.15   | 0.036   |
| HLA-DQA1    | 0.29                   | 0.285     | 0.80   | 0.041   |
| MET         | -0.42                  | 0.043     | -1.21  | 0.001   |
| PCDH10      | -0.91                  | 0.036     | -1.73  | 0.002   |
| TNF19       | -1.11                  | 0.007     | -0.84  | 0.015   |
| GSTT1       | -3.77                  | 0.007     | -1.51  | 0.013   |

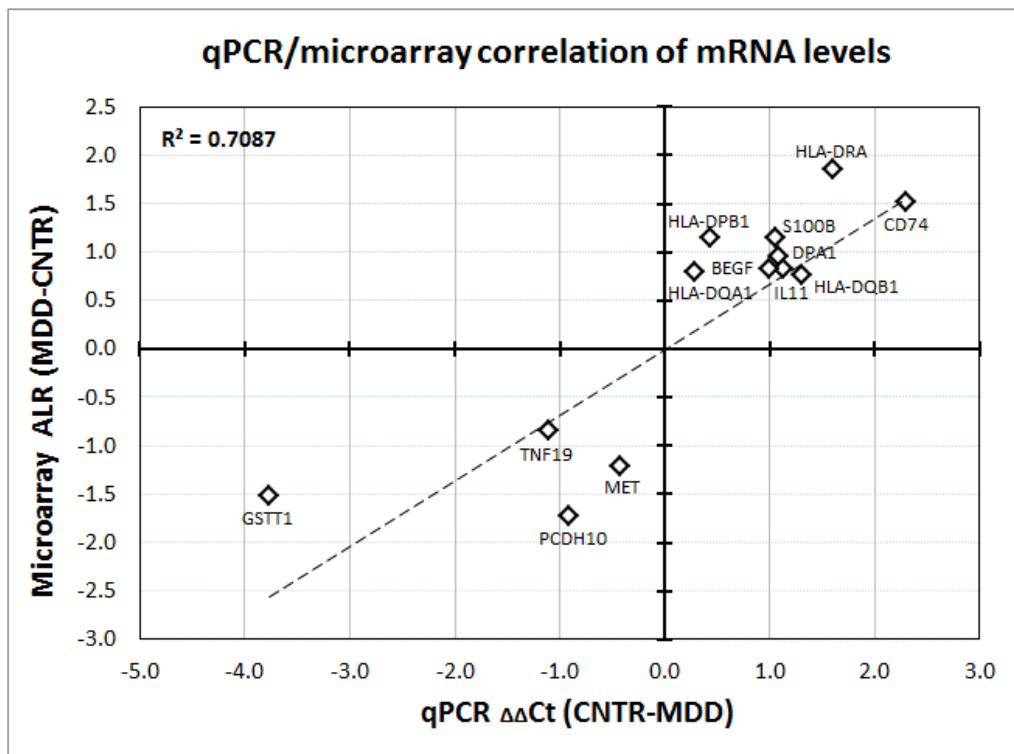

| miRNA ID        | ddCt D-C | p-value |
|-----------------|----------|---------|
| hsa-miR-122     | 2.17     | 0.00004 |
| hsa-miR-32      | 2.01     | 0.02137 |
| hsa-miR-196b*   | 1.96     | 0.02807 |
| hsa-miR-377     | 1.62     | 0.01040 |
| hsa-miR-193a-3p | 1.52     | 0.01756 |
| hsa-miR-337-5p  | 1.52     | 0.00428 |
| hsa-miR-675*    | 1.46     | 0.00648 |
| hsa-miR-3176    | 1.39     | 0.01719 |
| hsa-miR-21*     | 0.91     | 0.03960 |
| hsa-miR-22      | 0.76     | 0.04233 |
| hsa-miR-425*    | 0.71     | 0.02273 |
| hsa-miR-185     | 0.60     | 0.00380 |
| hsa-miR-296-5p  | 0.56     | 0.01870 |
| hsa-miR-103a    | 0.55     | 0.01982 |
| hsa-miR-107     | 0.53     | 0.03574 |
| hsa-miR-186     | 0.53     | 0.03432 |
| hsa-miR-887     | 0.45     | 0.02768 |
| hsa-miR-132     | -0.42    | 0.00278 |
| hsa-miR-421     | -0.43    | 0.00129 |
| hsa-miR-542-3p  | -0.44    | 0.00783 |
| hsa-miR-450a    | -0.50    | 0.02326 |
| hsa-miR-16-2*   | -0.54    | 0.03806 |
| hsa-miR-424     | -0.69    | 0.03091 |
| hsa-miR-628-3p  | -0.72    | 0.01009 |
| hsa-miR-629     | -0.76    | 0.02441 |
| hsa-miR-4293    | -0.77    | 0.00858 |
| hsa-miR-661     | -0.80    | 0.00724 |
| hsa-miR-3909    | -0.80    | 0.02860 |
| hsa-miR-33a*    | -0.80    | 0.01558 |
| hsa-miR-135b    | -0.84    | 0.02895 |
| hsa-miR-7       | -0.96    | 0.03198 |
| hsa-miR-4267    | -0.97    | 0.03604 |
| hsa-miR-548aa   | -1.05    | 0.00520 |
| hsa-miR-548d-3p | -1.25    | 0.01201 |
| hsa-miR-613     | -1.53    | 0.00250 |
| hsa-miR-3714    | -1.58    | 0.02024 |
| hsa-miR-1294    | -1.78    | 0.03714 |
| hsa-miR-429     | -2.00    | 0.01091 |

**Table S3. miRNA changes between fibroblasts originating from major depressive disorder (MDD) patients and healthy controls.** Positive  $\Delta\Delta\text{Ct}$  values denote miRNA downregulation in MDD fibroblasts (17 miRNAs), negative values correspond to the magnitude of upregulation (21 miRNAs).

**Table S4. Differentially expressed miRNAs in major depressive disorder (MDD) fibroblasts and their predicted mRNA targets (TargetScan).****A. Downregulated miRNAs in MDD and their putative mRNA expression targets (TargetScan)**

| miRNA ID        | ddCt D-C | p-value | # of mRNA targets | mRNA up in MDD  | mRNA down in MDD                                               | # mRNAs up | # mRNAs down |
|-----------------|----------|---------|-------------------|-----------------|----------------------------------------------------------------|------------|--------------|
| hsa-miR-122     | 2.17     | 0.0000  | 172               | ---             | FOXP2, CBL, OCLN, MASP1                                        | 0          | 4            |
| hsa-miR-32      | 2.01     | 0.0214  | 306               | BCL11A          | IL6ST, SSFA2, PAX3, PCDH10                                     | 1          | 4            |
| hsa-miR-196b*   | 1.96     | 0.0281  | 38                | ---             | ---                                                            | 0          | 0            |
| hsa-miR-377     | 1.62     | 0.0104  | 566               | ---             | SEMA3D, LSAMP, RALGPS2, DCLK1, ERC1, RASSF8, NFIB, CBL, PCDH10 | 0          | 9            |
| hsa-miR-193a-3p | 1.52     | 0.0176  | 207               | ---             | SLC23A2, FAIM2, ETV1,                                          | 0          | 3            |
| hsa-miR-337-5p  | 1.52     | 0.0043  | 14                | ---             | ---                                                            | 0          | 0            |
| hsa-miR-675*    | 1.46     | 0.0065  | 4                 | ---             | ---                                                            | 0          | 0            |
| hsa-miR-3176    | 1.39     | 0.0172  | 179               | ---             | SLC23A2, KCNJ2                                                 | 0          | 2            |
| hsa-miR-21      | 0.91     | 0.0396  | 164               | BCL11A          | PIK3R1, RALGPS2                                                | 1          | 2            |
| hsa-miR-22      | 0.76     | 0.0423  | 508               | SLC2A1          | FMNL2, ETV1, NFIB, CBL, OGN                                    | 1          | 5            |
| hsa-miR-425*    | 0.71     | 0.0227  | 212               | ---             | ZFHX4, CBL, XPNPEP3                                            | 0          | 3            |
| hsa-miR-185     | 0.60     | 0.0038  | 188               | ---             | NFIB                                                           | 0          | 1            |
| hsa-miR-296-5p  | 0.56     | 0.0187  | 172               | ---             | ---                                                            | 0          | 0            |
| hsa-miR-103a    | 0.55     | 0.0198  | 636               | FRMD4A , BCL11A | PIK3R1, PER3, DCLK1, KLF4, FGF18, RASSF8, NFIB, SVEP1, ZCCHC2  | 2          | 9            |
| hsa-miR-107     | 0.53     | 0.0357  | 14                | ---             | ---                                                            | 1          | 3            |
| hsa-miR-186     | 0.53     | 0.0343  | 849               | FRMD4A          | SLC23A2, FOXP2, KIAA1324L, NFIB, OCLN, AFF1                    | 1          | 6            |
| hsa-miR-887     | 0.45     | 0.0277  | 10                | ---             | ---                                                            | 0          | 0            |

Red lettering - upregulated mRNAs in MDD; Green lettering - downregulated mRNAs in MDD.

**B. Upregulated miRNAs in MDD and their putative mRNA expression targets (TargetScan)**

| miRNA ID        | ddCt D-C | p-value | # of mRNA targets | mRNA up in MDD                       | mRNA down in MDD                                                                                                                     | # mRNAs up | # mRNAs down |
|-----------------|----------|---------|-------------------|--------------------------------------|--------------------------------------------------------------------------------------------------------------------------------------|------------|--------------|
| hsa-mir-132     | -0.42    | 0.0028  | 261               | SLC2A1                               | ETV1, ANKRD29                                                                                                                        | 1          | 2            |
| hsa-mir-421     | -0.43    | 0.0013  | 426               | ---                                  | RAPGEF2, NFIB, CBL, DDX17                                                                                                            | 0          | 4            |
| hsa-mir-542     | -0.44    | 0.0078  | 286               | ---                                  | LSAMP, ZFH4, CBL                                                                                                                     | 0          | 3            |
| hsa-mir-450a    | -0.50    | 0.0233  | 9                 | ---                                  | ---                                                                                                                                  | 0          | 0            |
| hsa-mir-16      | -0.54    | 0.0381  | 387               | ---                                  | SEMA3D, HECTD1, ATP7A, RASSF8, SVEP1, ZCCHC2                                                                                         | 0          | 6            |
| hsa-mir-424     | -0.69    | 0.0309  | 175               | ---                                  | ZFH4                                                                                                                                 | 0          | 1            |
| hsa-mir-628-3p  | -0.72    | 0.0101  | 112               | ---                                  | DCLK1, AMPD3                                                                                                                         | 0          | 1            |
| hsa-mir-629-5p  | -0.76    | 0.0244  | 196               | ---                                  | ERAP1                                                                                                                                | 0          | 1            |
| hsa-mir-4293    | -0.77    | 0.0086  | 189               | SLC2A1                               | XPNPEP3                                                                                                                              | 1          | 1            |
| hsa-mir-661     | -0.80    | 0.0072  | 319               | ---                                  | IGF2BP3, NFIB, CBL,                                                                                                                  | 1          | 3            |
| hsa-mir-3909    | -0.80    | 0.0286  | 186               | ---                                  | CHM, CBL, PTGFRN                                                                                                                     | 1          | 3            |
| hsa-mir-33a     | -0.80    | 0.0156  | 417               | ---                                  | ZFH4, DST, DCLK1, ERC1, RASSF8, CPT1A, PTGFRN, PCDH10                                                                                | 0          | 8            |
| hsa-mir-135b    | -0.84    | 0.0289  | 69                | BCL11A                               | MASP1                                                                                                                                | 1          | 1            |
| hsa-mir-7       | -0.96    | 0.0320  | 444               | ---                                  | ZBTB38, KLF4, NFIB, KCNJ2                                                                                                            | 0          | 4            |
| hsa-mir-4267    | -0.97    | 0.0360  | 442               | ---                                  | ZFH4, DST, DCLK1, ERC1, RAPGEF2, RALGPS2, AFF1                                                                                       | 0          | 7            |
| hsa-mir-548a-3p | -1.05    | 0.0052  | 706               | SCG2, B3GNT7, SLC2A1, FRMD4A, BCL11A | SLC23A2, PIK3R1, LSAMP, ZFH4, FOXP2, RAPGEF2, IL1R1, NFIB, ERAP1                                                                     | 5          | 9            |
| hsa-mir-548d-3p | -1.25    | 0.0120  | 145               | ---                                  | FOXP2, PCDH10                                                                                                                        | 0          | 2            |
| hsa-mir-613     | -1.53    | 0.0025  | 240               | ---                                  | CHM, DDX17                                                                                                                           | 0          | 2            |
| hsa-mir-3714    | -1.58    | 0.0202  | 1276              | FRMD4A                               | DNAJC13, RALGPS2, PER3, ERC1, KLF4, ATP7A, RAPGEF2, ETV1, AMPD3, RASSF8, EBF3, KIAA1324L, NFIB, CPT1A, CBL, ENPP4, AFF1, KCNJ2, BMP6 | 1          | 19           |
| hsa-mir-1294    | -1.78    | 0.0371  | 298               | RUFY2, FRMD4A                        | SEMA3D, NFIB, CBL                                                                                                                    | 2          | 3            |
| hsa-mir-429     | -2.00    | 0.0109  | 237               | FRMD4A                               | RAPGEF2, RASSF8, CBL, OCLN                                                                                                           | 2          | 7            |

Red lettering - upregulated mRNAs in MDD; Green lettering - downregulated mRNAs in MDD.
